# Supplementary material for: On the half-life of thiocyanate in the plasma of the marine fish Amphiprion ocellaris: implications for cyanide detection
Source: PeerJ. 2019 Apr 2;7:e6644. doi: 10.7717/peerj.6644 (PMC6450372; doi:10.7717/peerj.6644)
Supplement: Supplemental Information 1 [file peerj-07-6644-s001.docx]

**SUPPLEMENTAL INFORMATION**

**On the half-life of Thiocyanate in the plasma of the marine fish Amphiprion ocellaris: implications for cyanide detection**

Nancy E. Breen1, J. Alexander Bonanno2, Sara Hunt1,3, Julia Grossman3, Jordan Brown1, Hannah Nolte1,3, and Andrew Rhyne3

1Department of Chemistry and Physics, Roger Williams University, Bristol, RI, USA

2School for the Environment, UMass Boston, Boston, MA, USA

3Department of Biology, Marine Biology and Environmental Science, Roger Williams University, Bristol, RI, USA

Corrresponding Author:

Andrew Rhyne3

Email Address: [arhyne@rwu.edu](mailto:arhyne@rwu.edu)


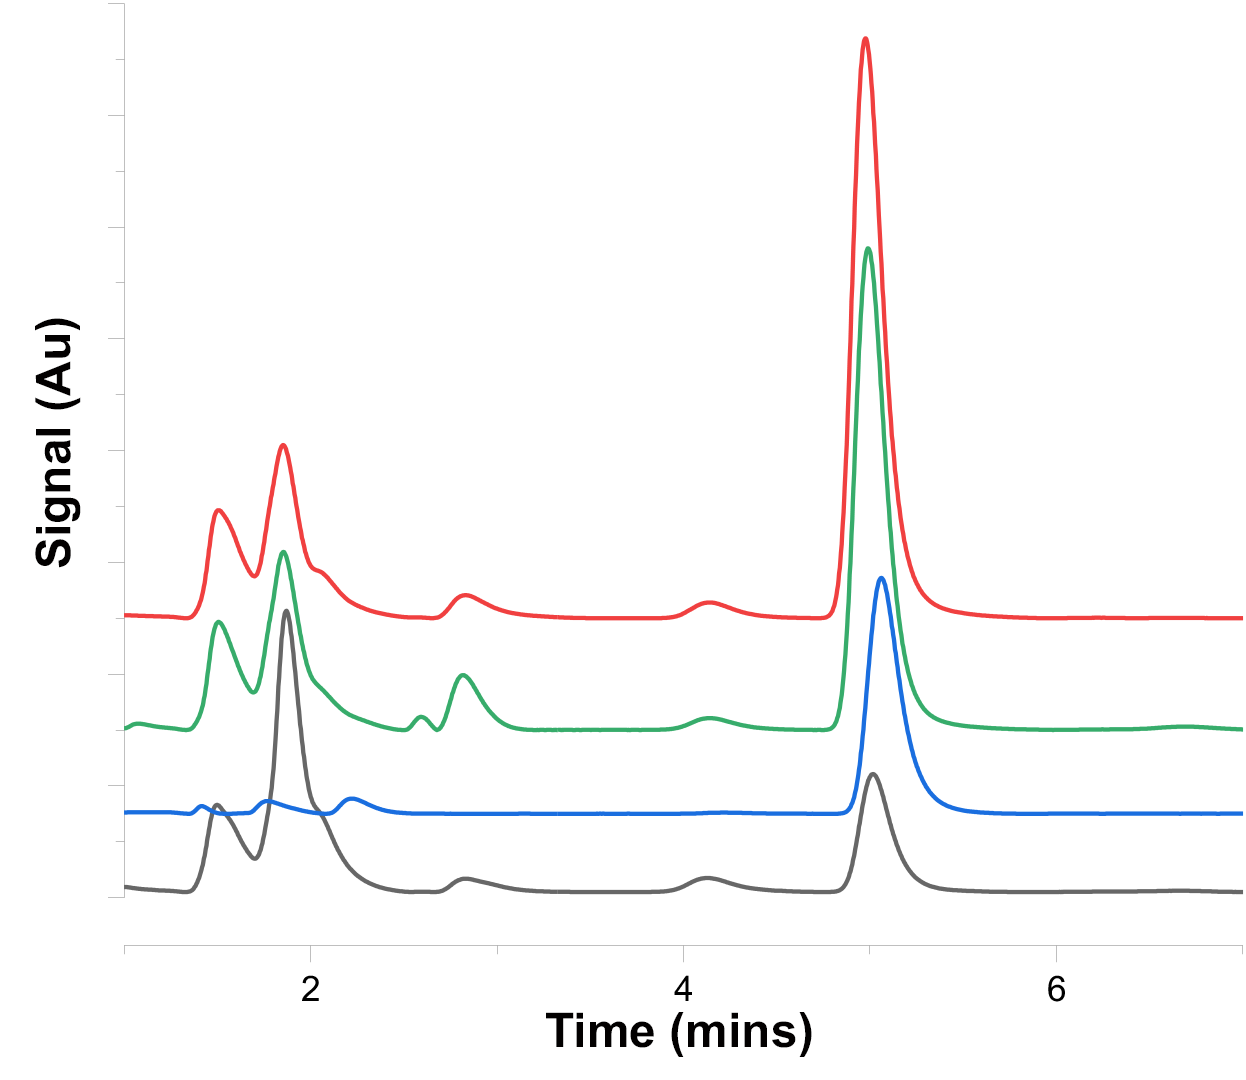


Figure S1. Chromatograms of SCN in the plasma of *Amphiprion oscellaris* after exposure to 100 ppm SCN for 11 days. Depuration times from top to bottom: 2 hours, 8 hours, 10 ppm standard and 49 hours. SCN peak is observed at 5.0 minutes


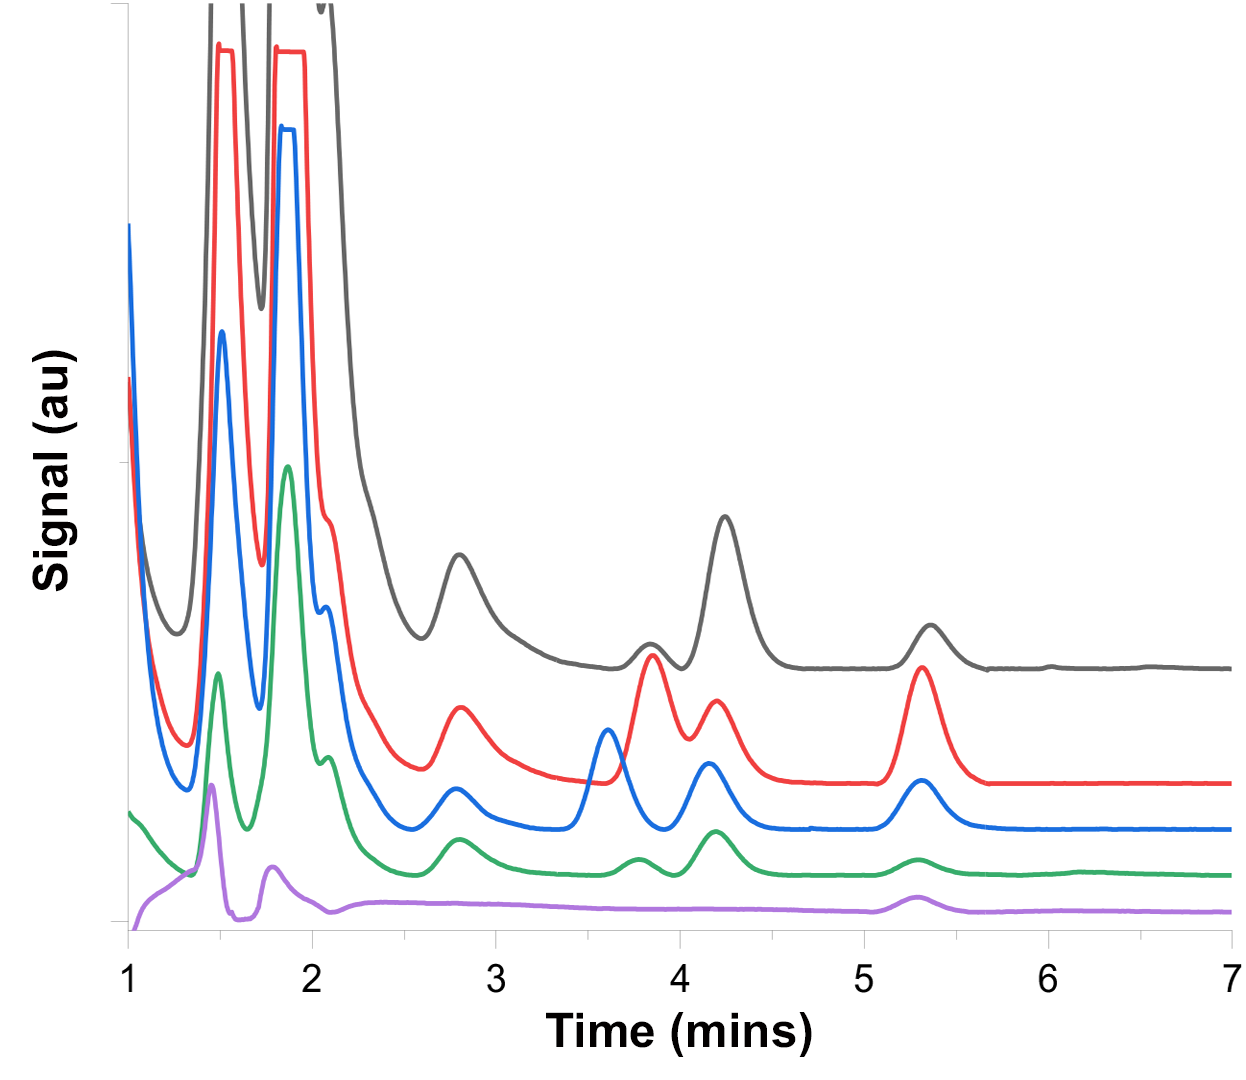


Figure S2. Chromatograms of SCN in the plasma of *Amphiprion oscellaris* after exposure to 50 ppm CN for 45 seconds. Depuration times from top to bottom: 2 hours, 15 hours, 24 hours, 48 hours and 0.1 ppb standard. SCN peak is observed at 5.3 minutes

| Table S1. Mean (SD) Plasma SCNconcentrations in *A. ocellaris* exposed to 50 ppm CN for 20, 45 and 60 seconds followed by 41 days depuration. | | | |
| --- | --- | --- | --- |
| Depuration  Time (days) | Plasma SCN concentration (ppm) | | |
| 20 second exposure | 45 second exposure | 60 second exposure |
| 0.10 | 0.6 (0.2) | 1.1 (0.2) |  |
| 0.16 | 0.65 (0.05) | 1.2 (0.3) |  |
| 0.27 | 0.8 (0.1) | 1.7 (0.4) | 1.6 (0.4)a |
| 0.49 | 1.3 (0.1) | 2.3 (0.2) | 1.8 (0.3)a |
| 0.62 | 1.4 (0.1) | 2.3 (0.5) |  |
| 1.0 | 0.9 (0.1) | 2.0 (0.6) | 2.0 (0.4)b |
| 2.0 | 0.6 (0.1) | 1.2 (0.3)b |  |
| 3.0 | 0.7 (0.4) | 2.5 (0.4) c |  |
| 3.5 |  | 0.8 (0.1)a |  |
| 4.0 | 0.6 (0.3) | 0.63 (0.07) |  |
| 6.0 | 0.62 (0.06) | 0.83 (0.08) c |  |
| 10 | 0.6 (0.1) | 0.8 (0.3) |  |
| 25 | 0.354 (0.002)a | 0.5 (0.1)ac |  |
| 41 | 0.172 (0.009)a | 0.3 (0.1)ac |  |
| Control | <0.05d | | |
| Note.n = 4. Exclusions noted.  a Sample size of 2 at: 25 and 41 days post 20 and 45 second exposure, at 3.5 days post 45-second exposure and at 0.27 and 0.49 days post 60-second exposure.  b Sample size of 3 at: 2.0 days post 45 second exposure and at 1.0 days post 60-second exposure.  c Data from fish in one exposure group (g5) were elimated from analysis due accidental prolonged exposure.  d Controls were below the LOQ of 10 ppb for 1:5 diluted plasma. | | | |

| Table S2. Plasma SCNconcentrations in *A. ocellaris* exposed to 100 ppmSCNfor 11 days followed by 48 days depuration. | |
| --- | --- |
| Time post exposure (days) | Plasma SCNconcentration (ppm) |
| 0.010 | 162 (29) |
| 0.090 | 181 (13)a |
| 0.18 | 220 (31) |
| 0.35 | 178 (43) |
| 0.59 | 114 (58) |
| 0.70 | 42 (17) |
| 1.0 | 71 (34) |
| 2.0 | 31 (16) |
| 4.0 | 8 (10) |
| 8.0 | 0.2 (0.2) |
| 14 | 0.26 (0.09) |
| 48 | <0.05 |
| Control | <0.05b |
| Note. Values are given as means (SD), all with sample size of 3. Exclusion noted.  a Sample size of 2 at 0.090 days post exposure.  b Controls were below the LOQ of 10 ppb for 1:5 diluted plasma. | |
