# Supplementary material for: On the half-life of thiocyanate in the plasma of the marine fish Amphiprion ocellaris: implications for cyanide detection
Source: PeerJ. 2019 Apr 2;7:e6644. doi: 10.7717/peerj.6644 (PMC6450372; doi:10.7717/peerj.6644)
Supplement: Supplemental Information 2 [file peerj-07-6644-s002.xlsx]

## Sheet: 45 s Clowns
Catalog #	Mass Tube	Exposure	Mass of Fish	Time of Blood Draw	Date Bled	Hours Post Exposure	# Tubes of blood	Mass Tube & Plasma (g)	Mass Plasma (g)	Volume Plasma (uL)	Reconstitute Vol (uL)	Peaksimple Area	Conc (ppm)	Days Post Exposure	Day Run on HPLC	Reconstitute Vol/Plasma Vol (uL)
618047	1.0231	45 (g2)	4.9047	10:29:00	2018-06-23	1.93333	12	1.0622	0.0391	38.1463	195.5	122.4	1.17438	0.0805556	2018-06-25	5.125
618048	1.0269	45 (g2)	3.9489	10:43:00	2018-06-23	2.16667	9	1.0521	0.0252	24.5854	126	128.5	1.22829	0.0902778	2018-06-25	5.125
618049	1.0223	45 (g2)	5.6286	10:53:00	2018-06-23	2.33333	12	1.0677	0.0454	44.2927	227	110.8	0.790061	0.0972222	2018-06-26	5.125
618050	1.0267	45 (g2)	3.3671	11:02:00	2018-06-23	2.48333	9	1.0533	0.0266	25.9512	133	122.9	1.1788	0.103472	2018-06-25	5.125
618051	1.0232	45 (g3)	4.1075	12:43:00	2018-06-23	4.06667	12	1.0638	0.0406	39.6098	203	147.5	1.39618	0.169444	2018-06-25	5.125
618052	1.0234	45 (g3)	5.2498	12:48:00	2018-06-23	4.15	12	1.0627	0.0393	38.3415	196.5	121.9	1.16997	0.172917	2018-06-25	5.125
618053	1.0221	45 (g3)	2.9949	12:53:00	2018-06-23	4.23333	6	1.0402	0.0181	17.6585	90.5	122.2	0.880165	0.176389	2018-06-26	5.125
618054	1.0279	45(g3)	5.5656	12:56:00	2018-06-23	4.28333	12	1.0685	0.0406	39.6098	203	161.9	1.52342	0.178472	2018-06-25	5.125
618055	1.0235	45 (g6)	5.7725	15:18:00	2018-06-23	6.33333	11	1.0576	0.0341	33.2683	170.5	230.4	2.1287	0.263889	2018-06-25	5.125
618056	1.0219	45 (g6)	6.315	15:26:00	2018-06-23	6.46667	12	1.0627	0.0408	39.8049	204	216.7	2.00764	0.269444	2018-06-25	5.125
618057	1.0236	45 (g6)	7.3502	15:35:00	2018-06-23	6.61667	12	1.0632	0.0396	38.6341	198	148.6	1.4059	0.275694	2018-06-25	5.125
618058	1.0204	45 (g6)	8.7935	15:42:00	2018-06-23	6.73333	12	1.0648	0.0444	43.3171	222	184.6	1.37336	0.280556	2018-06-27	5.125
618059	1.0266	45 (g2)	4.3541	20:16:00	2018-06-23	11.7167	10	1.0516	0.025	24.3902	250	103.9	2.02183	0.488194	2018-06-25	10.25
618060	1.0269	45 (g2)	3.4943	20:26:00	2018-06-23	11.9167	12	1.0668	0.0399	38.9268	399	120.5	2.31519	0.496528	2018-06-25	10.25
618061	1.0242	45 (g2)	5.4451	20:33:00	2018-06-23	12	12	1.0628	0.0386	37.6585	193	313.2	2.3898	0.5	2018-06-27	5.125
618062	1.0253	45 (g2)	5.31	20:40:00	2018-06-23	12.1167	12	1.0575	0.0322	31.4146	161	342.7	2.62296	0.504861	2018-06-27	5.125
618063	1.0235	45 (g2)	4.8849	23:45:00	2018-06-23	15.2167	11	1.0529	0.0294	28.6829	147	231.3	1.74247	0.634028	2018-06-26	5.125
618064	1.0218	45 (g2)	3.5951	23:50:00	2018-06-23	15.3	11	1.0546	0.0328	32	164	361.07	2.76815	0.6375	2018-06-26	5.125
618065	1.0224	45 (g2)	3.1567	23:54:00	2018-06-23	15.3667	7	1.0391	0.0167	16.2927	83.5	248.7	1.88	0.640278	2018-06-26	5.125
618066	1.0232	45 (g2)	4.6711	23:58:00	2018-06-23	15.4333	12	1.0623	0.0391	38.1463	195.5	346.2	2.65062	0.643056	2018-06-26	5.125
618067	1.0272	45 (g3)	4.4107	08:44:00	2018-06-24	24.0667	12	1.0558	0.0286	27.9024	286	135	2.57144	1.00278	2018-06-25	10.25
618068	1.0239	45 (g3)	3.9788	08:52:00	2018-06-24	24.2	12	1.0644	0.0405	39.5122	405	116.1	2.23743	1.00833	2018-06-25	10.25
618069	1.0252	45 (g3)	5.015	09:00:00	2018-06-24	24.3333	12	1.0607	0.0355	34.6341	177.5	165.2	1.22003	1.01389	2018-06-27	5.125
618070	1.0243	45 (g3)	5.725	09:08:00	2018-06-24	24.4667	12	1.0609	0.0366	35.7073	183	256.6	1.94244	1.01944	2018-06-26	5.125
618071	1.0232	45 (g3)	3.8476	08:45:00	2018-06-25	48.0833	11	1.0587	0.0355	34.6341	355	53.5	1.13113	2.00347	2018-06-25	10.25
618072	1.0255	45 (g3)	2.9955	08:53:00	2018-06-25	48.2167	8	1.0474	0.0219	21.3659	219	45.2	0.98445	2.00903	2018-06-25	10.25
618073	1.029	45 (g3)	3.8787	09:01:00	2018-06-25	48.35	10	1.0589	0.0299	29.1707	149.5	199.528	1.49135	2.01458	2018-06-27	5.125
618075	1.0224	45 (g5)	5.7291	08:50:00	2018-06-26	71.95	12	1.0611	0.0387	37.7561	193.5	341	2.60952	2.99792	2018-06-27	5.125	Exlcuded
618076	1.0197	45 (g5)	5.7953	08:59:00	2018-06-26	72.1	10	1.042	0.0223	21.7561	111.5	350.3	2.68303	3.00417	2018-06-26	5.125	Exlcuded
618077	1.0248	45 (g5)	6.5747	09:09:00	2018-06-26	72.2667	12	1.0589	0.0341	33.2683	170.5	362.5	2.77945	3.01111	2018-06-26	5.125	Exlcuded
618078	1.0218	45 (g5)	7.8345	09:17:00	2018-06-26	72.4	12	1.0392	0.0174	16.9756	87	259.5	1.96536	3.01667	2018-06-27	5.125	Exlcuded
618150	1.0251	45 s (g6)	5.3898	20:09:00	2018-06-26	83.1833	12	1.0628	0.0377	36.7805	188.5	122.5	0.882536	3.46597	2018-06-27	5.125
618151	1.0243	45 s (g6)	7.5792	20:14:00	2018-06-26	83.2667	12	1.055	0.0307	29.9512	153.5	100.07	0.705253	3.46944	2018-06-27	5.125
618079	1.0285	45 (g4)	3.1247	08:55:00	2018-06-27	96.15	8	1.0534	0.0249	24.2927	124.5	99.5	0.700748	4.00625	2018-06-27	5.125
618080	1.0262	45 (g4)	4.3398	09:03:00	2018-06-27	96.2833	8	1.0438	0.0176	17.1707	88	79	0.53872	4.01181	2018-06-27	5.125
618081	1.0221	45 (g4)	4.0111	09:12:00	2018-06-27	96.4333	12	1.0524	0.0303	29.561	151.5	89.89	0.624792	4.01806	2018-06-27	5.125
618082	1.0225	45 (g4)	4.387	09:20:00	2018-06-27	96.5667	12	1.0582	0.0357	34.8293	178.5	94.3	0.659648	4.02361	2018-06-27	5.125
618083	1.0241	45 (g5)	5.4577	08:58:00	2018-06-29	144.083	12	1.0524	0.0283	27.6098	141.5	105.145	0.745365	6.00347	2018-07-02	5.125	Exlcuded
618084	1.0267	45 (g5)	5.3238	09:10:00	2018-06-29	144.283	11	1.0468	0.0201	19.6098	100.5	128.95	0.933516	6.01181	2018-07-02	5.125	Exlcuded
618085	1.0268	45 (g5)	5.1316	09:16:00	2018-06-29	144.383	12	1.0513	0.0245	23.9024	122.5	115.27	0.825392	6.01597	2018-07-02	5.125	Exlcuded
618086	1.0258	45 (g5)	7.5992	09:25:00	2018-06-29	144.533	12	1.0505	0.0247	24.0976	123.5	112.65	0.804684	6.02222	2018-07-02	5.125	Exlcuded
618087	1.0282	45 (g5)	5.079	10:44:00	2018-07-03	241.85	12	1.0559	0.0277	27.0244	138.5	40.2	0.374679	10.0771	2018-07-03	5.125	Exlcuded
618088	1.026	45 (g4)	3.7218	10:50:00	2018-07-03	241.933	9	1.0488	0.0228	22.2439	114	129.5	1.07957	10.0806	2018-07-03	5.125
618089	1.0193	45 (g4)	3.704	11:00:00	2018-07-03	242.1	10	1.0358	0.0165	16.0976	82.5	86.2	0.737783	10.0875	2018-07-03	5.125
618090	1.021	45 (g4)	4.8384	11:08:00	2018-07-03	242.233	12	1.0542	0.0332	32.3902	166	114.02	0.957381	10.0931	2018-07-03	5.125
618091	1.0225	45 (g4)	4.012	08:00:00	2018-07-18	599.2	9	1.0498	0.0273	26.6341	136.5	69.83	0.581	24.9667	2018-07-18	5.125
618092	1.0273	45(g4)	8.3799	08:07:00	2018-07-18	599.317	12	1.0532	0.0259	25.2683	129.5	48.9	0.39	24.9715	2018-07-18	5.125
618093	1.0258	45 (g5)	5.4719	11:11:00	2018-08-03	987.367	9	1.0545	0.0287	28	143.5	49.3142	0.390849	41.1403	2018-08-06	5.125	Exlcuded
618094	1.0242	45 (g4)	4.1874	11:24:00	2018-08-03	987.583	11	1.0556	0.0314	30.6341	157	26.8424	0.197103	41.1493	2018-08-06	5.125
Added CN at 8:08 to group 1 (7/12 fish)
33 sec starting to slow down
after 60 sec - fish were removed from exposure tank
After 9 min- fish are starting to move
After 11 min- a few fish are starting to swim for short periods of time
After 22 min- most fish are upright, about 3-4 dead
Added CN at 8:33 to group 2 (12/12 fish)
After 45 sec- fish were removed from exposure tank
After 15 min-most fish are upright and moving
After 20 min-all the fish are upright and swimming
Added CN at 8:40 to group 3 (11/12 fish)
After 45 sec-fish were removed from exposure tank
After 12 min-some fish are upright and moving
After 15 min-all fish are upright and moving except one
Added CN at 8:46 to group 4 (10/12 fish)
After 45 sec-fish were removed from exposure tank
After 12 min- Some fish are moving, not many are upright yet
Added CN at 8:53 to group 5 (10/12 fish)
After 52 sec-fish were removed from exposure tank
Added CN at 8:58 to group 6 (6/6 fish)
After 45 sec-fish were removed from exposure tank
Added CN at 9:15 to group 7 (12 fish)
After 20 sec-fish were removed
Added CN at 9:17 to group 8 (12 fish)
20 sec-removed
5 min-fish are moving and upright
Added CN at 9:22 to group 9 (12 fish)
20 sec- removed
Added CN at 9:27 to group 10 (12 fish)
20 sec removed

## Sheet: 20 s Clowns
Catalog #	Mass Tube	Exposure	Mass of Fish	Time of Blood Draw	Date Bled	Hours Post Exposure	# Tubes of blood	Mass Tube & Plasma (g)	Mass Plasma (g)	Volume Plasma (uL)	Reconstitute Vol (uL)	Peaksimple Area	Conc (ppm)	Days Post Exposure	Day Run on HPLC	Reconstitute Vol/Plasma Vol (uL)
618095	1.0253	20 s (g10)	7.4098	11:43:00	2018-06-23	2.28333	11	1.0621	0.0368	35.9024	184	89.12	0.618706	0.0951389	2018-06-26	5.125
618096	1.027	20 s (g10)	4.5178	11:49:00	2018-06-23	2.38333	10	1.0542	0.0272	26.5366	136	77.7	0.528445	0.0993056	2018-06-26	5.125
618097	1.0247	20 s (g10)	4.3337	12:01:00	2018-06-23	2.58333	10	1.0585	0.0338	32.9756	169	60.64	0.393605	0.107639	2018-06-26	5.125
618098	1.025	20 s (g10)	5.7933	12:10:00	2018-06-23	2.73333	12	1.0624	0.0374	36.4878	187	127.4	0.921265	0.113889	2018-06-27	5.125
618099	1.0215	20 s (g7)	5.8729	13:02:00	2018-06-23	3.78333	12	1.0574	0.0359	35.0244	179.5	88	0.609854	0.157639	2018-06-27	5.125
618100	1.0261	20 s (g7)	6.2876	13:06:00	2018-06-23	3.85	12	1.0603	0.0342	33.3659	171	99.2	0.698377	0.160417	2018-06-26	5.125
618101	1.0226	20 s (g7)	8.0021	13:10:00	2018-06-23	3.91667	12	1.0597	0.0371	36.1951	185.5	97.62	0.685889	0.163194	2018-06-26	5.125
618102	1.0228	20 s (g7)	7.2548	13:14:00	2018-06-23	3.98333	12	1.0654	0.0426	41.561	213	88	0.609854	0.165972	2018-06-26	5.125
618103	1.0209	20 s (g10)	3.8785	15:48:00	2018-06-23	6.35	8	1.047	0.0261	25.4634	130.5	102.2	0.722089	0.264583	2018-06-26	5.125
618104	1.0248	20 s (g10)	5.839	15:55:00	2018-06-23	6.46667	12	1.0643	0.0395	38.5366	197.5	112.6	0.804288	0.269444	2018-06-26	5.125
618105	1.0237	20 s (g10)	7.1925	16:03:00	2018-06-23	6.6	12	1.068	0.0443	43.2195	221.5	97.2	0.682569	0.275	2018-06-26	5.125
618106	1.0197	20 s (g10)	7.3953	16:10:00	2018-06-23	6.71667	12	1.0608	0.0411	40.0976	205.5	130	0.941815	0.279861	2018-06-27	5.125
618107	1.0223	20 s (g7)	5.45	20:46:00	2018-06-23	11.5167	11	1.0583	0.036	35.122	360	58.8	1.2248	0.479861	2018-06-25	10.25
618108	1.0252	20 s (g7)	7.0977	20:52:00	2018-06-23	11.6167	12	1.061	0.0358	34.9268	358	61.4	1.27075	0.484028	2018-06-25	10.25
618109	1.0208	20 s (g7)	6.5637	20:59:00	2018-06-23	11.7333	12	1.0603	0.0395	38.5366	197.5	175.5	1.30144	0.488889	2018-06-27	5.125
618110	1.0233	20 s (g7)	7.0842	21:06:00	2018-06-23	11.85	12	1.0623	0.039	38.0488	195	206.4	1.54567	0.49375	2018-06-27	5.125
618111	1.028	20 s (g7)	5.7313	1900-01-01 00:02:00	2018-06-23	14.8	12	1.0662	0.0382	37.2683	191	173.3	1.28405	0.616667	2018-06-26	5.125
618112	1.0291	20 s (g7)	6.4886	00:07:00	2018-06-23	14.8833	12	1.0625	0.0334	32.5854	167	207.7	1.55594	0.620139	2018-06-26	5.125
618113	1.022	20 s (g7)	7.1988	00:11:00	2018-06-23	14.95	12	1.0574	0.0354	34.5366	177	185.6	1.38127	0.622917	2018-06-27	5.125
618114	1.0243	20 s (g7)	6.9993	00:13:00	2018-06-23	14.9833	12	1.0608	0.0365	35.6098	182.5	168.7	1.24769	0.624306	2018-06-26	5.125
618115	1.0219	20 s (g10)	4.2986	09:14:00	2018-06-24	23.7833	12	1.0515	0.0296	28.878	296	44.5	0.97208	0.990972	2018-06-25	10.25
618116	1.0264	20 s (g10)	4.1578	09:21:00	2018-06-24	23.9	10	1.059	0.0326	31.8049	163	98	0.95878	0.995833	2018-06-27	5.125
618117	1.0273	20 s (g10)	7.7388	09:29:00	2018-06-24	24.0333	12	1.066	0.0387	37.7561	193.5	94	0.657277	1.00139	2018-06-26	5.125
618118	1.0241	20 s (g10)	8.863	09:37:00	2018-06-24	24.1667	12	1.0644	0.0403	39.3171	201.5	122.2	0.880165	1.00694	2018-06-27	5.125
618119	1.0202	20 s (g8)	3.8644	09:11:00	2018-06-25	47.9	10	1.049	0.0288	28.0976	144	70.1	0.712248	1.99583	2018-06-25	5.125
618120	1.0236	20 s (g8)	2.8459	09:20:00	2018-06-25	48.05	8	1.0425	0.0189	18.439	94.5	38.9	0.436557	2.00208	2018-06-25	5.125
618121	1.0247	20 s (g8)	4.725	09:28:00	2018-06-25	48.1833	12	1.0583	0.0336	32.7805	168	85.8	0.592466	2.00764	2018-06-27	5.125
618122	1.0266	20 s (g8)	4.9464	09:36:00	2018-06-25	48.3167	12	1.0617	0.0351	34.2439	175.5	71.6	0.480231	2.01319	2018-06-28	5.125
618123	1.0235	20 s (g9)	3.3889	09:22:00	2018-06-26	72	8	1.0413	0.0178	17.3659	89	49.4	0.304766	3	2018-06-26	5.125
618124	1.0263	20 s (g9)	5.4911	09:33:00	2018-06-26	72.1833	12	1.0535	0.0272	26.5366	136	83.4	0.573497	3.00764	2018-06-26	5.125
618125	1.0226	20 s (g9)	5.7384	09:41:00	2018-06-26	72.3167	12	1.0456	0.023	22.439	115	157.894	1.16228	3.01319	2018-06-28	5.125
618126	1.0269	20 s (g9)	6.5036	09:50:00	2018-06-26	72.4667	12	1.0547	0.0278	27.122	139	100.32	0.707229	3.01944	2018-06-26	5.125
618127	1.0248	20 s (g8)	4.529	09:28:00	2018-06-27	96.1833	12	1.0568	0.032	31.2195	160	43.333	0.256814	4.00764	2018-06-28	5.125
618128	1.0191	20 s (g8)	4.183	09:35:00	2018-06-27	96.3	11	1.0492	0.0301	29.3659	150.5	136.9	0.996351	4.0125	2018-06-28	5.125
618129	1.0252	20 s (g8)	4.1899	09:43:00	2018-06-27	96.4333	12	1.0531	0.0279	27.2195	139.5	98.8721	0.695785	4.01806	2018-06-27	5.125
618130	1.023	20 s (g8)	5.465	09:51:00	2018-06-27	96.5667	12	1.0478	0.0248	24.1951	124	56.3	0.359303	4.02361	2018-06-27	5.125
618131	1.0297	20 s (g9)	4.6097	09:34:00	2018-06-29	144.2	12	1.0524	0.0227	22.1463	113.5	93.54	0.653641	6.00833	2018-07-02	5.125
618132	1.0196	20 s (g9)	4.8993	09:42:00	2018-06-29	144.333	12	1.0493	0.0297	28.9756	148.5	95.96	0.672769	6.01389	2018-07-02	5.125
618133	1.0228	20 s (g9)	4.9002	09:53:00	2018-06-29	144.517	12	1.0513	0.0285	27.8049	142.5	88.8527	0.616594	6.02153	2018-07-02	5.125
618134	1.021	20 s (g9)	4.7257	09:58:00	2018-06-29	144.6	12	1.0443	0.0233	22.7317	116.5	77.56	0.527338	6.025	2018-07-02	5.125
618135	1.0247	20 s (g9)	3.8484	11:16:00	2018-07-03	241.833	9	1.0468	0.0221	21.561	110.5	55.4	0.494661	10.0764	2018-07-03	5.125
618136	1.0205	20 s (g9)	5.6463	11:25:00	2018-07-03	241.983	12	1.0499	0.0294	28.6829	147	69.99	0.609828	10.0826	2018-07-03	5.125
618137	1.0273	20 s (g9)	5.5974	11:32:00	2018-07-03	242.1	12	1.0527	0.0254	24.7805	127	71.23	0.619616	10.0875	2018-07-03	5.125
618138	1.0273	20 s (g9)	6.1312	11:39:00	2018-07-03	242.217	12	1.0588	0.0315	30.7317	157.5	89.56	0.764305	10.0924	2018-07-03	5.125
618139	1.024	20 s (g9)	4.5263	08:14:00	2018-07-18	599.133	12	1.0608	0.0368	35.9024	184	44.21	0.3555	24.9639	2018-07-18	5.125
618140	1.0276	20 s (g9)	8.1249	08:19:00	2018-07-18	599.95	12	1.0469	0.0193	18.8293	96.5	37.49	0.353287	24.9979	2018-07-18	5.125
618201	1.0215	20s (g9)	4.6451	11:34:00	2018-08-03	988.2	11	1.0514	0.0299	29.1707	149.5	23.205	0.165743	41.175	2018-08-06	5.125
618202	1.026	20 s (g9)	7.54	11:47:00	2018-08-03	988.417	12	1.0651	0.0391	38.1463	195.5	24.6494	0.178196	41.184	2018-08-06	5.125

## Sheet: Control
Catalog #	Mass Tube	Exposure	Mass of Fish	Time of Blood Draw	Date Bled	Hours Post Exposure	# Tubes of blood	Mass Tube & Plasma (g)	Mass Plasma (g)	Volume Plasma (uL)	Reconstitute Vol (uL)	Peaksimple Area	Conc (ppm)	Days Post Exposure	Day Run on HPLC	Reconstitute Vol/Plasma Vol (uL)	n	Average Days Post Exposure	Average Conc (ppm)	St Dev
618153	1.0239	Control	8.1496	09:04:00	2018-07-07	-	12	1.0553	0.0314	30.6341	157	0	0	-	2018-08-06	5.125		-
618154	1.0236	Control	5.5872	09:16:00	2018-07-07	-	12	1.0632	0.0396	38.6341	198	0	0	-	2018-08-06	5.125		-
618155	1.0224	Control	6.165	09:24:00	2018-07-07	-	12	1.0582	0.0358	34.9268	179	No Peak	-	-	2018-08-06	5.125		-
618156	1.0272	Control	13.9866	09:32:00	2018-07-07	-	12	1.0861	0.0589	57.4634	294.5	4.94	0.00826759	-	2018-08-06	5.125	4	-	0.008	0.005

## Sheet: 60 s Clowns
Catalog #	Mass Tube	Exposure	Mass of Fish	Time of Blood Draw	Date Bled	Hours Post Exposure	# Tubes of blood	Mass Tube & Plasma (g)	Mass Plasma (g)	Volume Plasma (uL)	Reconstitute Vol (uL)	Peaksimple Area	Conc (ppm)	Days Post Exposure	Day Run on HPLC	Reconstitute Vol/Plasma Vol (uL)
618143	1.0193	60 s (g1)	5.1592	16:16:00	2018-06-23	8.1	12	1.0634	0.0441	43.0244	220.5	250.6	1.89502	0.3375	2018-06-27	5.125
618144	1.0219	60 s (g1)	4.0061	16:19:00	2018-06-23	8.15	9	1.0515	0.0296	28.878	148	183.497	1.36465	0.339583	2018-06-27	5.125
618145	1.0255	60 s (g1)	5.1434	21:11:00	2018-06-23	13.05	12	1.0643	0.0388	37.8537	194	258.3	1.95588	0.54375	2018-06-27	5.125
618146	1.0287	60 s (g1)	3.9575	21:15:00	2018-06-23	13.1167	11	1.0539	0.0252	24.5854	126	208.6	1.56306	0.546528	2018-06-28	5.125
618147	1.0244	60 s (g1)	4.9278	09:43:00	2018-06-24	25.5833	12	1.0642	0.0398	38.8293	199	317.4	2.42299	1.06597	2018-06-26	5.125
618148	1.0249	60 s (g1)	3.7537	09:49:00	2018-06-24	25.6833	11	1.0605	0.0356	34.7317	178	251	1.89818	1.07014	2018-06-26	5.125
618149	1.0229	61 s (g1)	3.901	09:53:00	2018-06-24	25.75	8	1.043	0.0201	19.6098	100.5	233.325	1.75848	1.07292	2018-06-28	5.125
